# Supplementary material
Source: publisher site journal article supplement (https://www.degruyterbrill.com/publication/isbn/9783110296532/downloadAsset/9783110296532_Inhaltsverzeichnis.pdf)
Supplement: Supplementary file 1 [file 9783110296532_Inhaltsverzeichnis.pdf]

# Inhaltsverzeichnis

|                                                                                                |    |
|------------------------------------------------------------------------------------------------|----|
| 1. Einleitung .....                                                                            | 1  |
| 2. Methodologie und Theorie.....                                                               | 6  |
| 2.1. Interaktionale Ansätze in der Linguistik.....                                             | 6  |
| 2.2. Konstruktionsgrammatik .....                                                              | 15 |
| 2.3. Interaktionale Prosodieforschung.....                                                     | 16 |
| 2.4. Intonation .....                                                                          | 18 |
| 2.4.1. Autosegmentale Phonologie .....                                                         | 19 |
| 2.4.2. Die Intonation des Deutschen:<br>Inventar und Beschreibung.....                         | 20 |
| 3. Türkischdeutsch: Varietät oder Stil? .....                                                  | 24 |
| 3.1. Ethnolekte und ethnische Stile: Forschungsstand .....                                     | 24 |
| 3.1.1. Die ethnolektale Varietät „Türkischdeutsch“ .....                                       | 25 |
| 3.1.2. Türkischdeutsch als kommunikativ sozialer Stil.....                                     | 30 |
| 3.1.3. Türkischdeutsch als ethnischer (Sprech-)Stil .....                                      | 32 |
| 3.1.4. Code-Switching und ‚Gemischt-sprechen‘ in bi- und<br>multilingualer Kommunikation ..... | 36 |
| 3.1.5. Mediale Stilisierungen: ‚Kanak Sprach‘ .....                                            | 38 |
| 3.1.6. Türkischdeutsch als Forschungsgegenstand in nicht<br>linguistischen Disziplinen .....   | 39 |
| 3.1.7. Untersuchungen zu vergleichbaren Phänomenen in<br>anderen Ländern .....                 | 40 |

|                                                                                        |    |
|----------------------------------------------------------------------------------------|----|
| 3.1.8. Zusammenfassung: Forschungsstand .....                                          | 47 |
| 3.2. Türkischdeutsch als Sprachkontaktphänomen .....                                   | 50 |
| 3.3. Fazit: Türkischdeutsch als ethnischer Stil.....                                   | 52 |
| 4. Daten .....                                                                         | 54 |
| 5. Rhythmus im Türkischdeutschen .....                                                 | 58 |
| 5.1. Rhythmus als isochrone Struktur .....                                             | 60 |
| 5.1.1. Die ‚starke‘ Isochroniehypothese.....                                           | 60 |
| 5.1.2. Die ‚schwache‘ Isochroniehypothese .....                                        | 65 |
| 5.1.3. Zusammenfassung und Diskussion: Akzent- und<br>silbenbasierender Rhythmus ..... | 71 |
| 5.1.4. Rhythmus als Gestalt .....                                                      | 76 |
| 5.2. Rhythmus als metrische Prominenz .....                                            | 79 |
| 5.2.1. Metrische Gitter .....                                                          | 80 |
| 5.2.2. Rhythmische Wohlgeformtheit in silben- und<br>akzentbasierenden Sprachen .....  | 82 |
| 5.2.3. Zusammenfassung und Diskussion:<br>Metrische Phonologie .....                   | 84 |
| 5.3. Rhythmus im Gespräch .....                                                        | 86 |
| 5.4. Fazit: Sprachlicher Rhythmus .....                                                | 92 |
| 5.5. Rhythmus im Deutschen und Türkischen.....                                         | 93 |
| 5.5.1. Akzentbasierender Rhythmus des Deutschen .....                                  | 94 |
| 5.5.2. Silbenbasierender Rhythmus im Türkischen .....                                  | 96 |

|                                                                                                                 |     |
|-----------------------------------------------------------------------------------------------------------------|-----|
| 5.5.3. Zusammenfassung: Phonetisch-phonologische<br>Unterschiede zwischen dem Deutschen<br>und Türkischen ..... | 98  |
| 5.6. Rhythmische Muster im Türkischdeutschen .....                                                              | 99  |
| 5.6.1. Rhythmische Einheitenbildung durch<br>Akzentisochronie .....                                             | 101 |
| 5.6.2. Rhythmische Einheitenbildung durch rekurrente<br>Akzentstruktur .....                                    | 109 |
| 5.6.3. Zusammenfassung: Rhythmische Einheitenbildung im<br>Türkischdeutschen .....                              | 122 |
| 5.6.3.1. Phonetische und phonologische Strukturen in<br>rhythmischen Einheiten .....                            | 124 |
| 5.6.3.2. Syntaktische Strukturen in rhythmischen<br>Einheiten.....                                              | 125 |
| 5.6.4. Funktionen rhythmischer Strukturen im<br>Türkischdeutschen .....                                         | 126 |
| 5.6.4.1. Rhythmus und Gesprächsorganisation .....                                                               | 127 |
| 5.6.4.1.1. Rhythmus und unerwartete Handlungen .....                                                            | 128 |
| 5.6.4.1.2. Rhythmus und Themenorganisation .....                                                                | 132 |
| 5.6.4.2. Rhythmus als rhetorische Ressource in<br>Turnkonstruktionseinheiten .....                              | 142 |
| 5.6.4.2.1. Rhythmus in Erzählungen .....                                                                        | 142 |
| 5.6.4.2.2. Rhythmus in Feststellungen .....                                                                     | 148 |

|                                                                                  |     |
|----------------------------------------------------------------------------------|-----|
| 5.6.5. Zusammenfassung: Funktionen von Rhythmus im<br>Türkischdeutschen.....     | 155 |
| 5.6.6. Zum Vergleich: Rhythmus im gesprochenen Deutsch ....                      | 155 |
| 5.7. Fazit: Rhythmus im Türkischdeutschen .....                                  | 159 |
| 6. Kontrast im Türkischdeutschen .....                                           | 162 |
| 6.1. Verknüpfungen .....                                                         | 166 |
| 6.1.1. Verknüpfungen mit koordinierenden Konjunktionen .....                     | 166 |
| 6.1.2. Asyndetische Verknüpfungen .....                                          | 168 |
| 6.2. Das Konzept ‚Kontrast‘: Dimensionen semantischer<br>Beschreibungen .....    | 170 |
| 6.2.1. Typologie kontrastiver Relationen .....                                   | 174 |
| 6.2.2. Asyndetische und kopulative Verknüpfungen kontrastive<br>Relationen ..... | 181 |
| 6.2.3. Die Rolle des Kontextes bei der Interpretation<br>von Kontrast .....      | 184 |
| 6.2.4. Kontrast im Gespräch .....                                                | 187 |
| 6.2.5. Kontrast im gesprochenen Deutsch .....                                    | 194 |
| 6.2.6. Diskussion und Auswertung des Forschungsstands .....                      | 195 |
| 6.2.7. Fazit: Kontrast als Konstruktion .....                                    | 197 |
| 6.3. Die Markierung von Kontrast im Türkischen .....                             | 199 |
| 6.4. Eine türkischdeutsche Konstruktion des Kontrastierens .....                 | 201 |
| 6.4.1. Formen der türkischdeutschen Kontrast-Konstruktion ..                     | 202 |

6.4.2. Zusammenfassung: Merkmale der türkischdeutschen  
 Kontrastkonstruktion ..... 218

6.4.3. Grenzfälle der türkischdeutschen  
 Kontrastkonstruktion ..... 221

6.4.3.1. Kontrast mit adversativem Konnektor ..... 222

6.4.3.2. Unklares kontrastives Potenzial ..... 226

6.4.3.3. Zusammenfassung: Grenzfälle..... 229

6.4.4. Funktionen der türkischdeutschen  
 Kontrastkonstruktion ..... 230

6.4.4.1. Erklären-Warum durch Kontrastieren ..... 232

6.4.4.2. Rechtfertigen durch Kontrastieren ..... 239

6.4.4.3. Zusammenfassung: Erklären-Warum und  
 Rechtfertigen mit einer türkischdeutschen  
 Kontrastkonstruktion ..... 248

6.4.5. Zum Vergleich: Kontrast mit ‚aber‘ im  
 gesprochenen Deutsch ..... 249

6.4.6. Zusammenfassung: Kontrast mit ‚aber‘ im  
 gesprochenen Deutsch ..... 256

6.5. Fazit: Eine türkischdeutsche Kontrastkonstruktion ..... 258

7. Fazit und Ausblick ..... 261

Literaturverzeichnis ..... 264

Register ..... 281
